# Supplementary material for: Automated assembly of species metabolomes through data submission into a public repository
Source: PubMed Central journal article supplement (PMC5737527; doi:10.1093/gigascience/gix062), 2017-07-19
Supplement: gix062_response-to-reviewer-comments_original-submission.pdf [file gix062_response-to-reviewer-comments_original-submission.pdf]

## **Author's Response To Reviewer Comments**

We thank the editors for their valuable suggestions and most importantly the copy editor for her help to improve the manuscript. We have implemented all requested changes.
